# Supplementary material for: 2.4 GHz Electromagnetic Field Influences the Response of the Circadian Oscillator in the Colorectal Cancer Cell Line DLD1 to miR-34a-Mediated Regulation
Source: MDPI journal article supplement (doi:10.3390/ijms232113210), 2022-10-30
Supplement: s1 [file s1]

**Supplementary Table S1:** Primer sequences.

| Gene            | Strand    | Sequence (5' → 3')                     | Accession number | Annealing temperature (°C) |
|-----------------|-----------|----------------------------------------|------------------|----------------------------|
| <i>cry1</i>     | sense     | CCG TCT GTT TGT GAT TCG TG             | NM_004075.4      | 49                         |
|                 | antisense | AAG TTA GAG GCG GTT GTC CA             |                  |                            |
| <i>cry2</i>     | sense     | GGA GGC TGG TGT GGA AGT AG             | NM_001127457.2   | 49                         |
|                 | antisense | CGT AGG TCT CGT CGT GGT TC             |                  |                            |
| <i>per2</i>     | sense     | AAT GCC GAT ATG TTT GCG GT             | NM_022817.1      | 53                         |
|                 | antisense | GCA TCG CTG AAG GCA TCT CT             |                  |                            |
| <i>clock</i>    | sense     | CCG GAA ACA ATA CCT CCA CC             | NM_001267843.2   | 53                         |
|                 | antisense | CAC ATG AAA CAG ACA CCC CA             |                  |                            |
| <i>bmal1</i>    | sense     | ACT TCC CCT CTA CCT GCT CAA            | NM_001297724.1   | 53                         |
|                 | antisense | TGT CTT CAT CCA GCC CCA TC             |                  |                            |
| <i>sirt1</i>    | sense     | CCG GAA ACA ATA CCT CCA CC             | NM_001142498.2   | 53                         |
|                 | antisense | CAC ATG AAA CAG ACA CCC CA             |                  |                            |
| <i>survivin</i> | sense     | GGA CCA CCG CAT CTC TAC AT             | NM_001168        | 53                         |
|                 | antisense | GAC AGA AAG GAA AGC GCA AC             |                  |                            |
| <i>s17</i>      | sense     | CAA GAT AGC AGG TTA TGT CAC G          | NM_001021.3      | 53                         |
|                 | antisense | AGC TTC AGC ATT TCC TTA GTG T          |                  |                            |
| <i>miR-34a</i>  | sense     | GCA GTG GCA GTG TCT TAG                | MIMAT0000255     | 62 (2x)                    |
|                 | antisense | GGT CCA GTT TTT TTT TTT TTT TAC<br>AAC |                  | 60 (36x)                   |

*cry*, cryptochrome; *per2*, period circadian regulator 2; *clock*, circadian locomotor output cycles protein kaput; *bmal1*, brain and muscle ARNT-like 1; *sirt1*, sirtuin 1; *survivin*, baculoviral IAP repeat containing 5; *s17*, ribosomal protein S17; number in parenthesis refers to number of cycles under given temperature.
